# Supplementary material for: Comparative Anticancer Potentials of Taxifolin and Quercetin Methylated Derivatives against HCT-116 Cell Lines: Effects of O-Methylation on Taxifolin and Quercetin as Preliminary Natural Leads
Source: PubMed Central journal article supplement — ACS Omega. 2022 Dec 7;7(50):46629–39. doi: 10.1021/acsomega.2c05565 (PMC9774329; doi:10.1021/acsomega.2c05565), 2022-12-07
Supplement: ao2c05565_si_001.pdf [file ao2c05565_si_001.pdf]

Supplementary Material

**Comparative anti-cancer potentials of taxifolin and quercetin methylated derivatives against HCT-116 cell line: Effects of O-methylation on taxifolin and quercetin as preliminary natural leads**

Hamdoon A. Mohammed<sup>1,2\*</sup>, Suliman A. Almahmoud <sup>1</sup>, El-Sayed M. El-Ghaly<sup>2</sup>, Firdos Alam Khan<sup>3</sup>, Abdul-Hamid Emwas<sup>4</sup>, Mariusz Jaremko<sup>5</sup>, Fatimah Almulhim<sup>5</sup>, Riaz A. Khan<sup>1</sup>, and Ehab A. Ragab<sup>2\*</sup>

<sup>1</sup>Department of Medicinal Chemistry and Pharmacognosy, College of Pharmacy, Qassim University, Qassim 51452, Saudi Arabia

<sup>2</sup>Department of Pharmacognosy and Medicinal Plants, Faculty of Pharmacy, Al-Azhar University, Cairo 11884, Egypt

<sup>3</sup>Department of Stem Cell Research, Institute for Research and Medical Consultations (IRMC); Imam Abdulrahman Bin Faisal University, 31441 Dammam-Saudi Arabia

<sup>4</sup>CoreLabs, King Abdullah University of Science and Technology (KAUST), 23955-6900 Thuwal, Saudi Arabia.

<sup>5</sup>Smart-Health Initiative (SHI) and Red Sea Research Center (RSRC), Division of Biological and Environmental Sciences and Engineering (BESE), King Abdullah

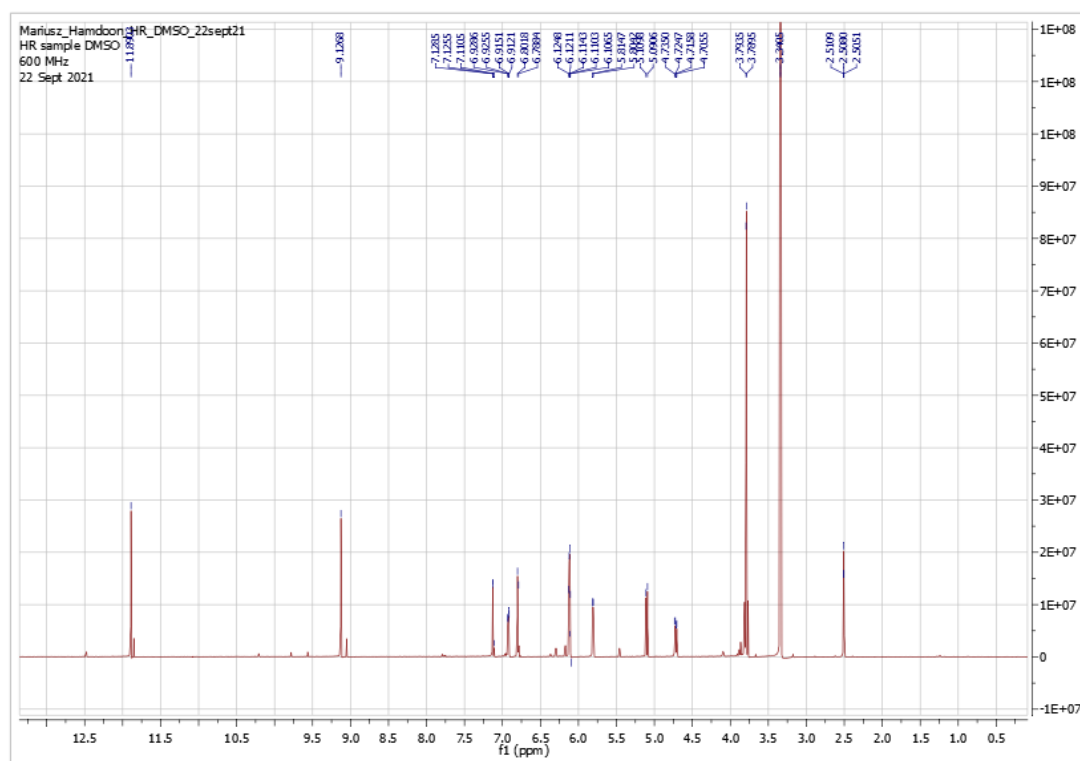

Figure S1:  $^1\text{H}$  NMR spectrum of compound **1** (DMSO- $d_6$ , 600 MHz)

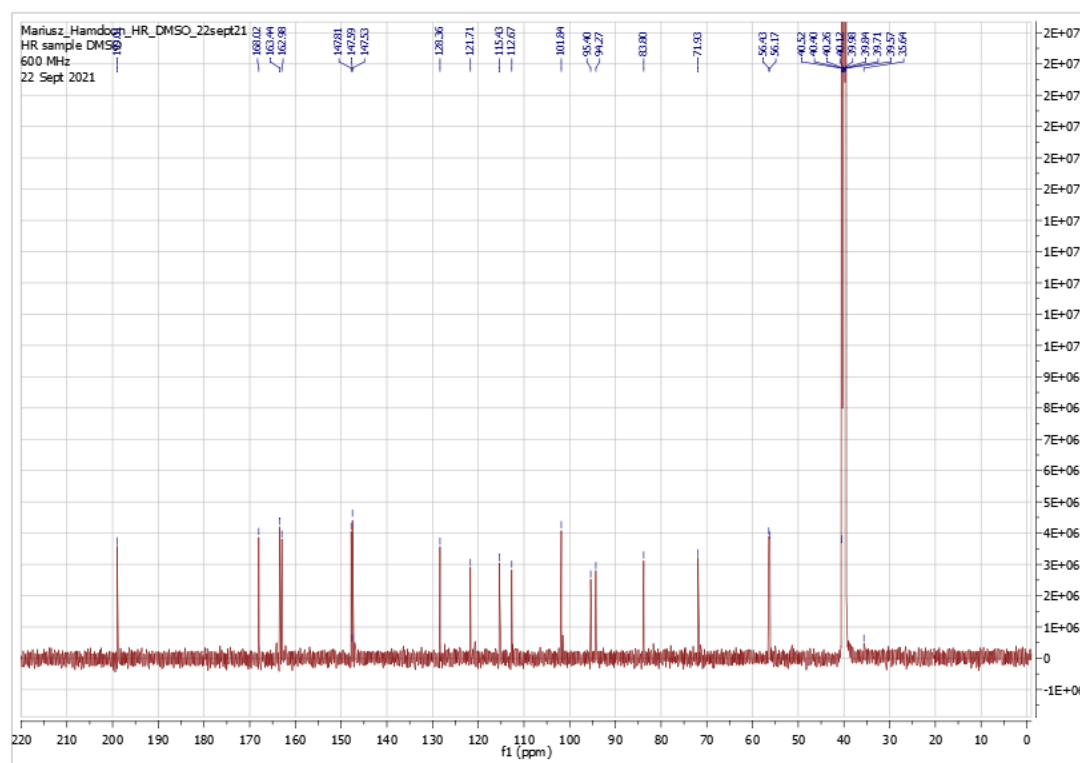

Figure S2:  $^{13}\text{C}$  NMR spectrum of compound **1** (DMSO- $d_6$ , 150 MHz)

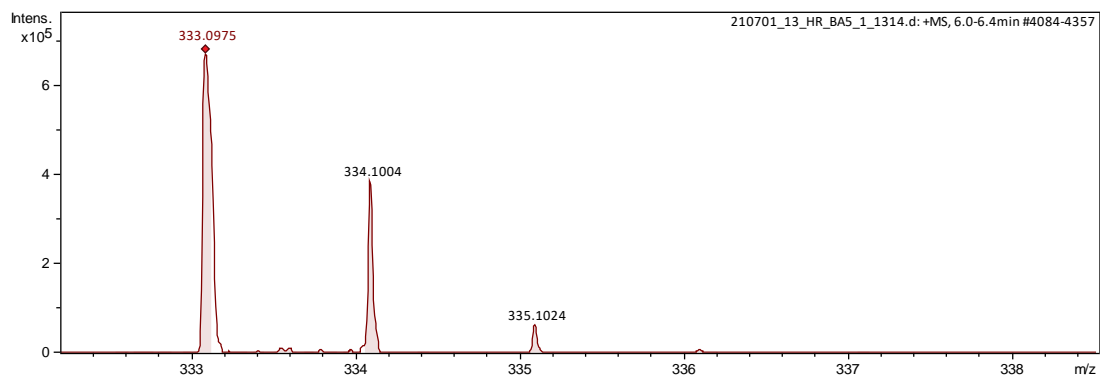

Figure S3: +ESIMS of compound 1

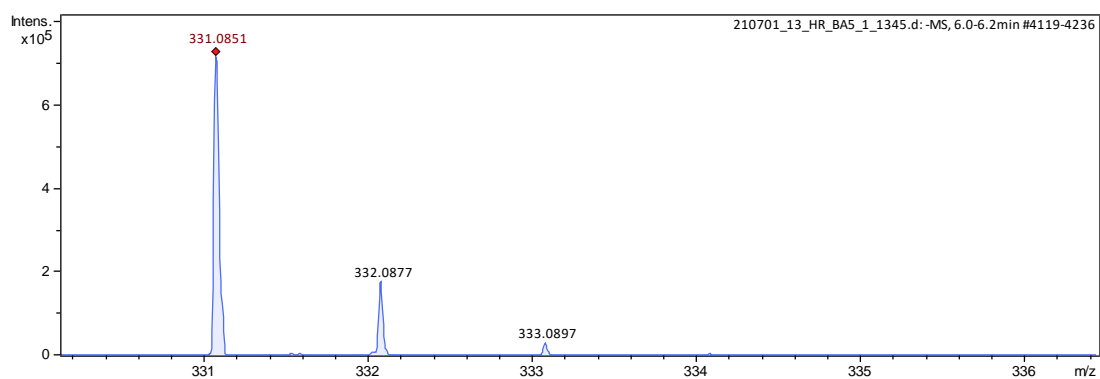

Figure S4: -ESIMS of compound 1

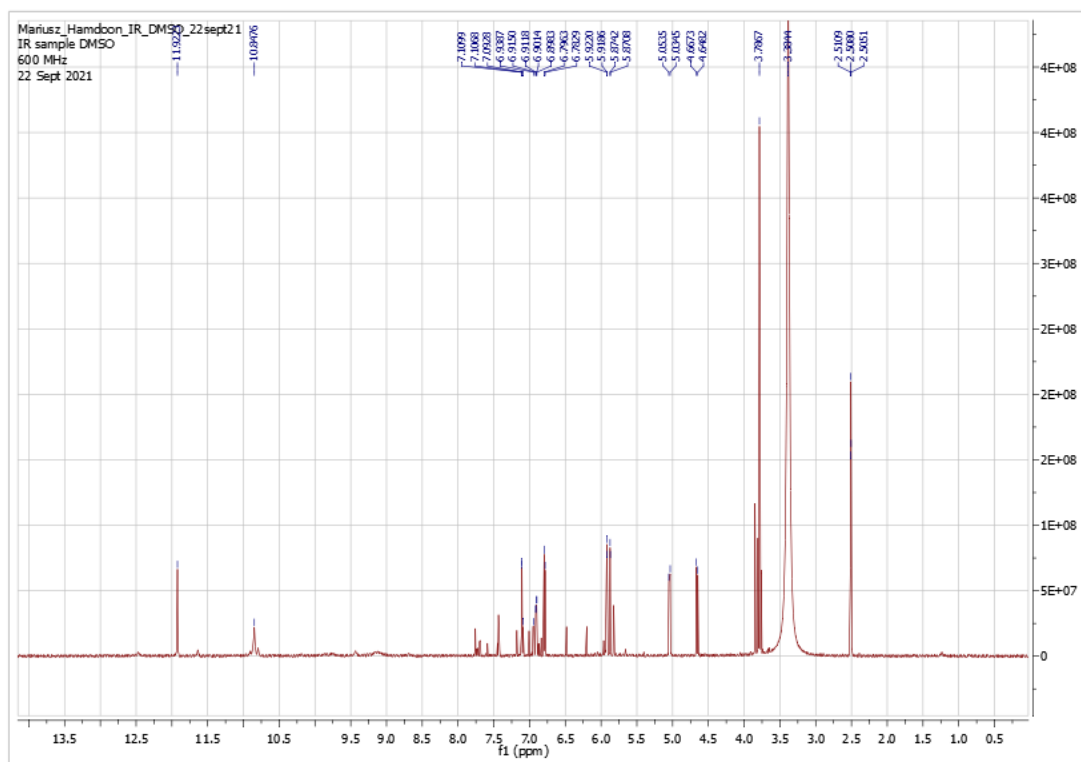

Figure S5: <sup>1</sup>H NMR spectrum of compound 2 (DMSO-*d*<sub>6</sub>, 600 MHz)

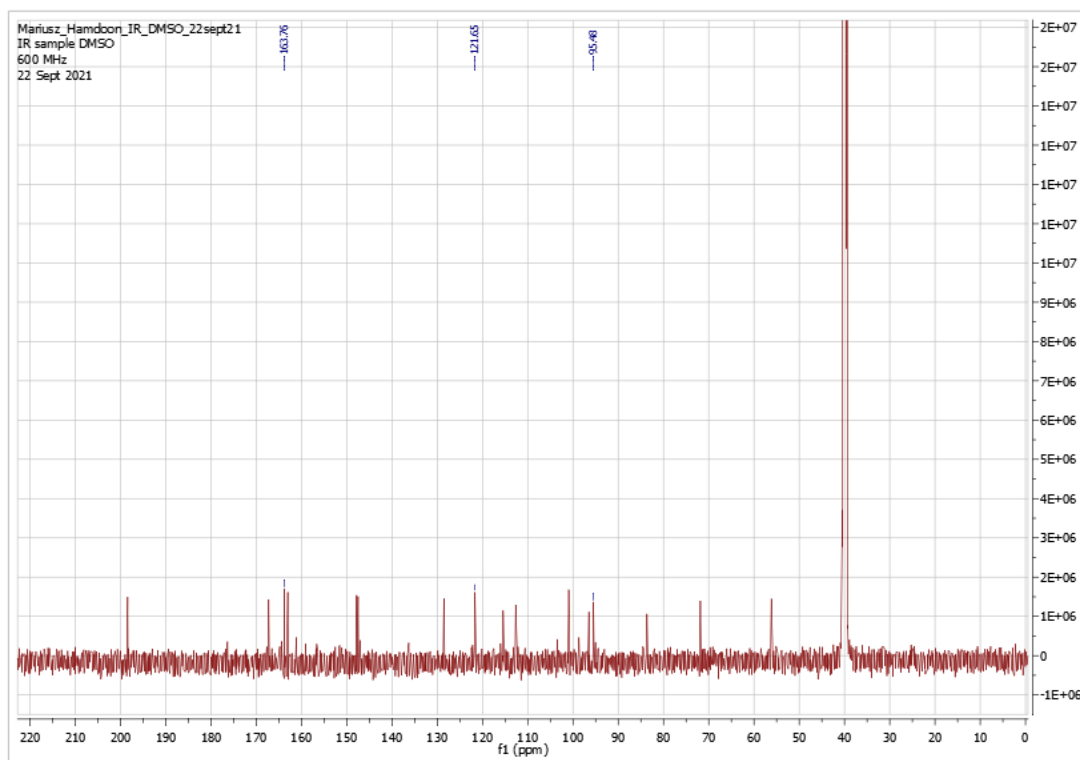

Figure S6:  $^{13}\text{C}$  NMR spectrum of compound **2** (DMSO- $d_6$ , 150 MHz)

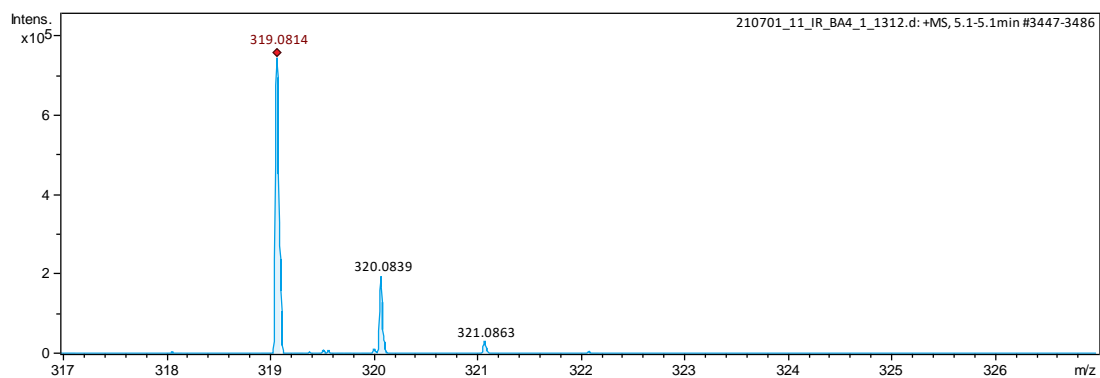

Figure S7: +ESIMS of compound **2**

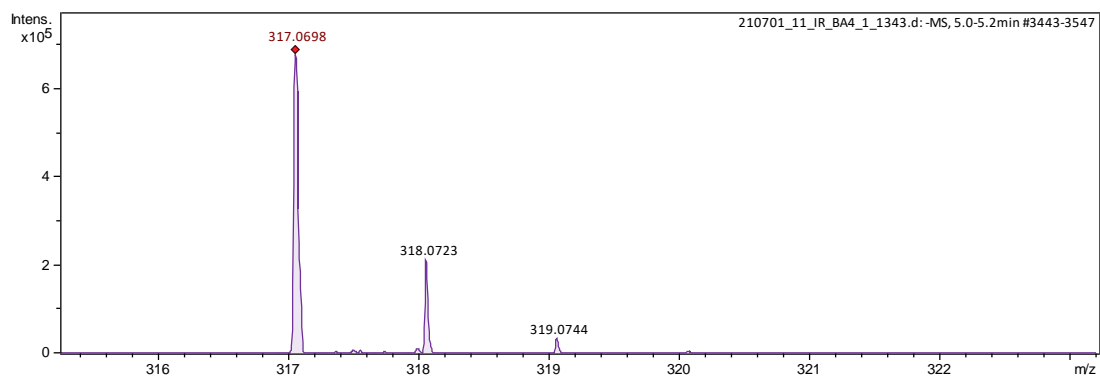

Figure S8: -ESIMS of compound **2**

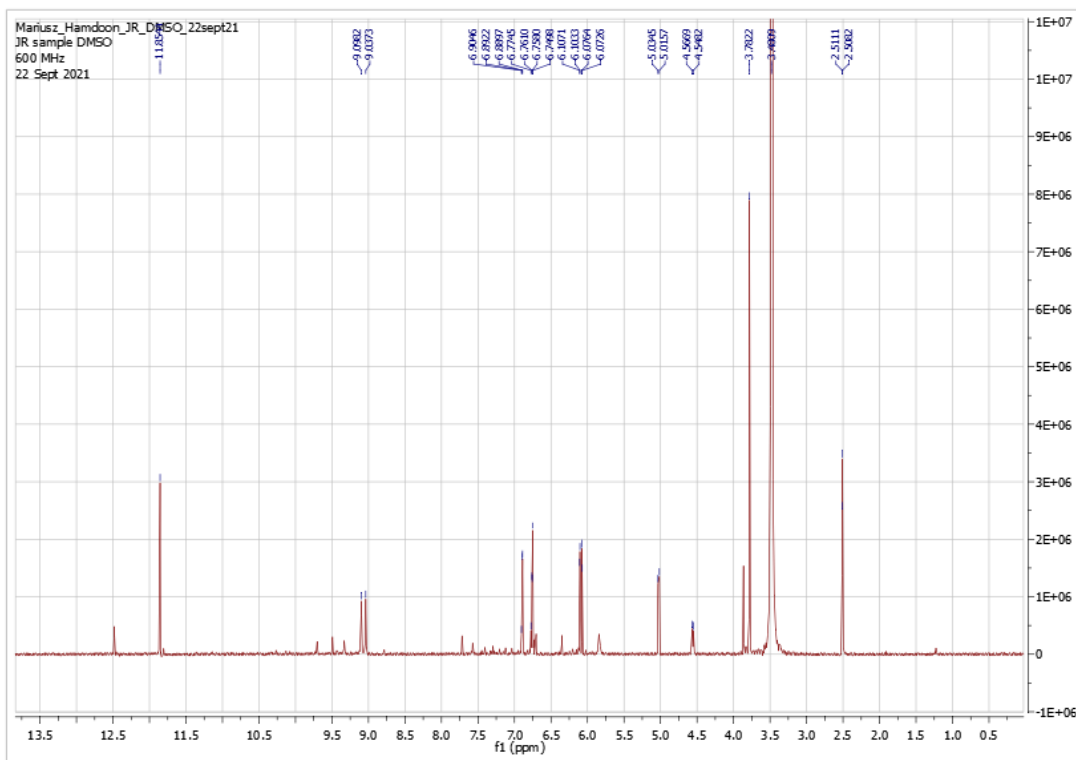

Figure S9:  $^1\text{H}$  NMR spectrum of compound **3** (DMSO- $d_6$ , 600 MHz)

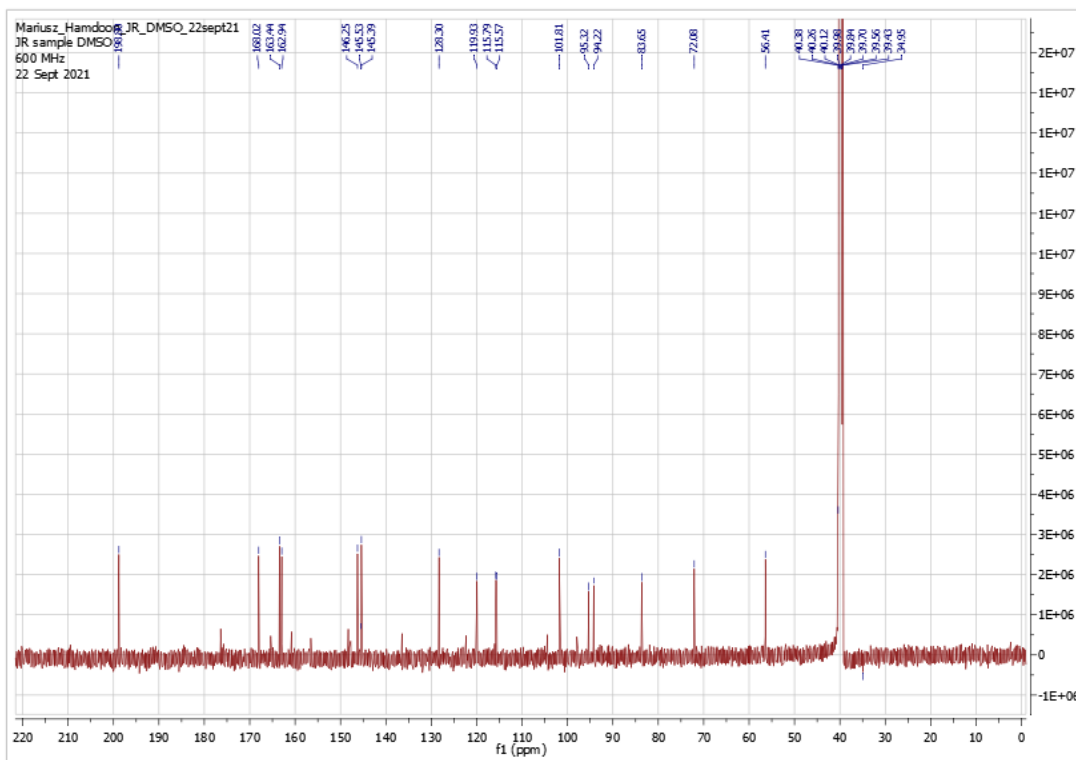

Figure S10:  $^{13}\text{C}$  NMR spectrum of compound **3** (DMSO- $d_6$ , 150 MHz)

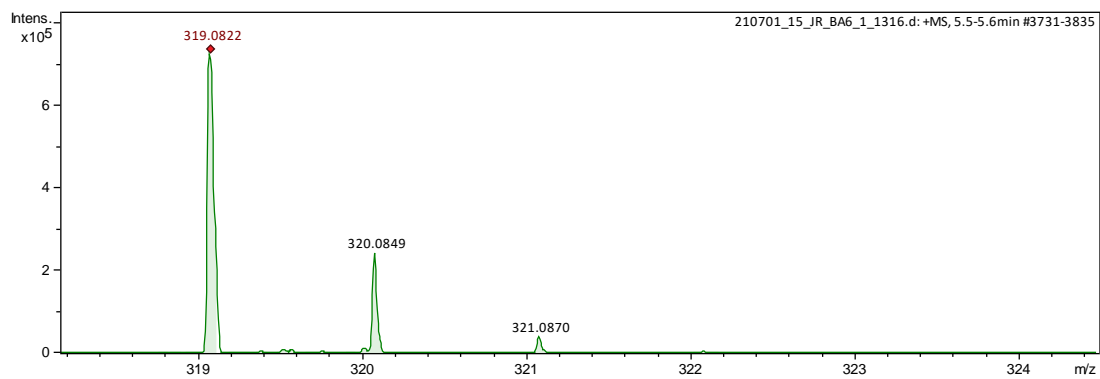

Figure S11: +ESIMS of compound **3**

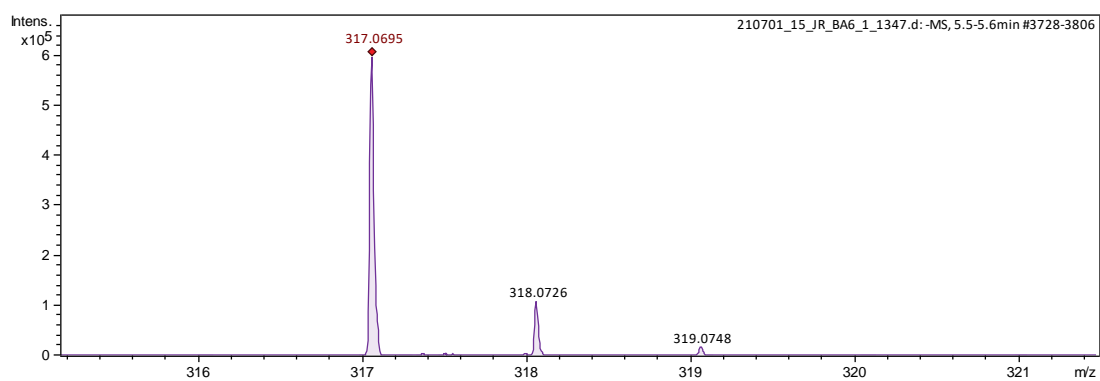

Figure S12: -ESIMS of compound **3**

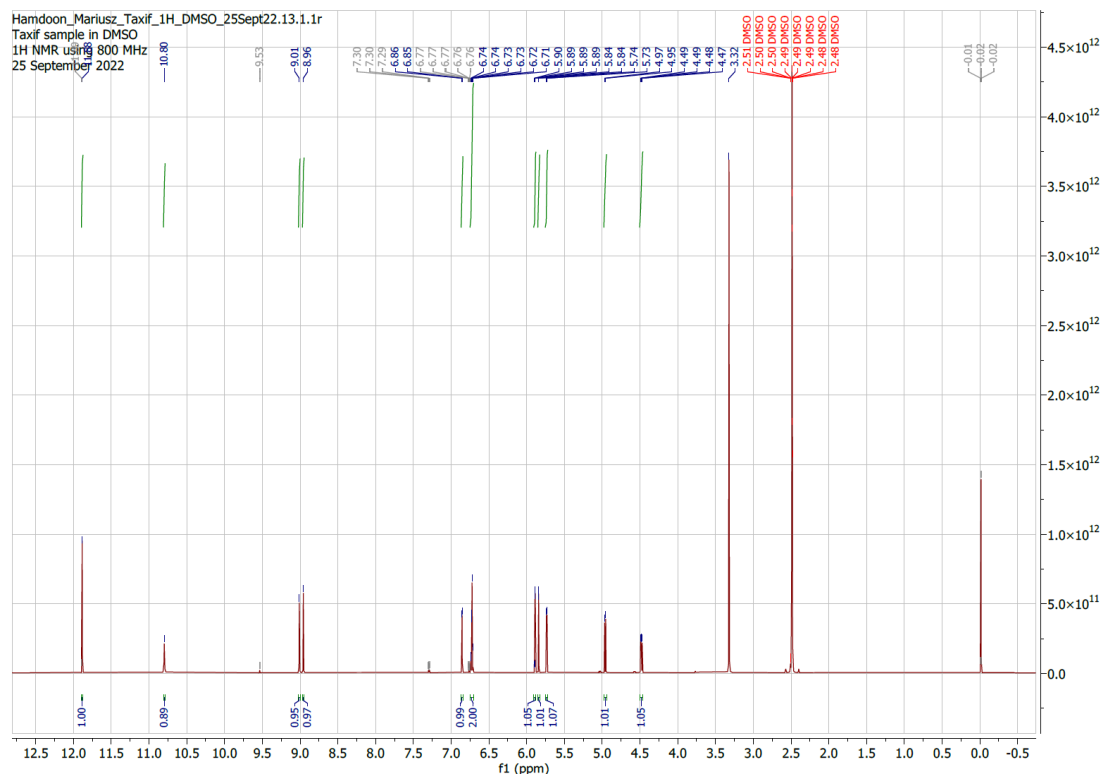

Figure S13: <sup>1</sup>H NMR spectrum of compound **4** (DMSO-*d*<sub>6</sub>, 800 MHz)

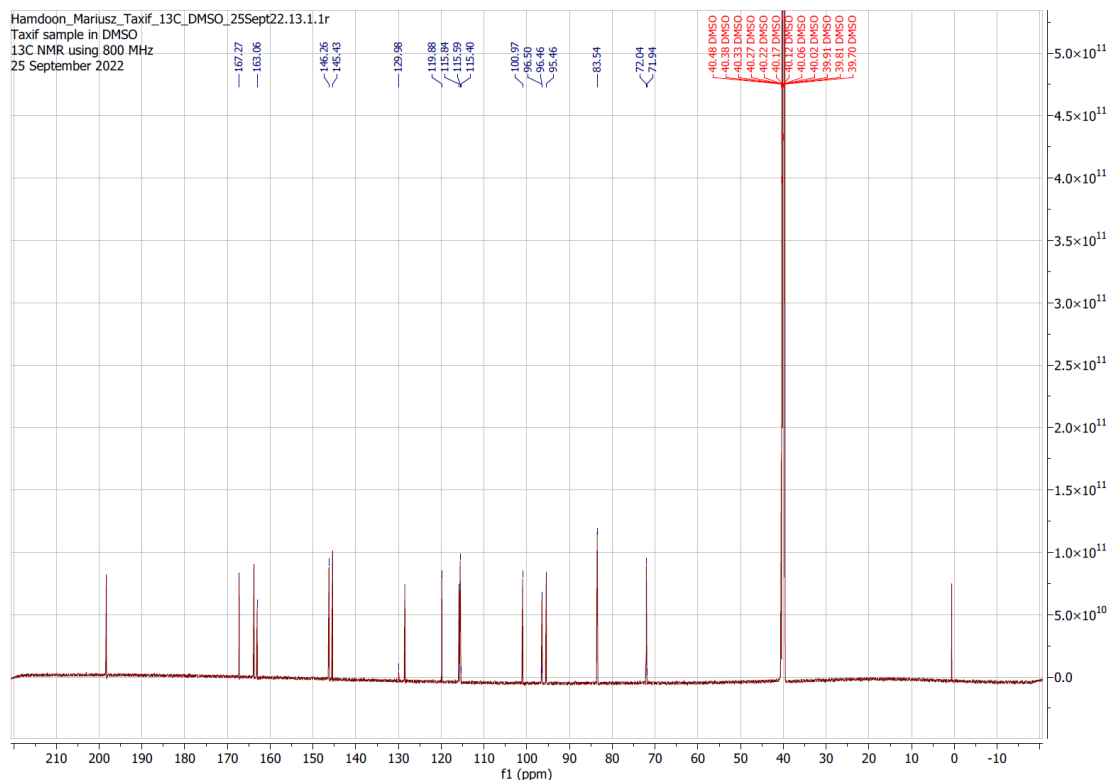

Figure S14:  $^{13}\text{C}$  NMR spectrum of compound **4** (DMSO- $d_6$ , 200 MHz)

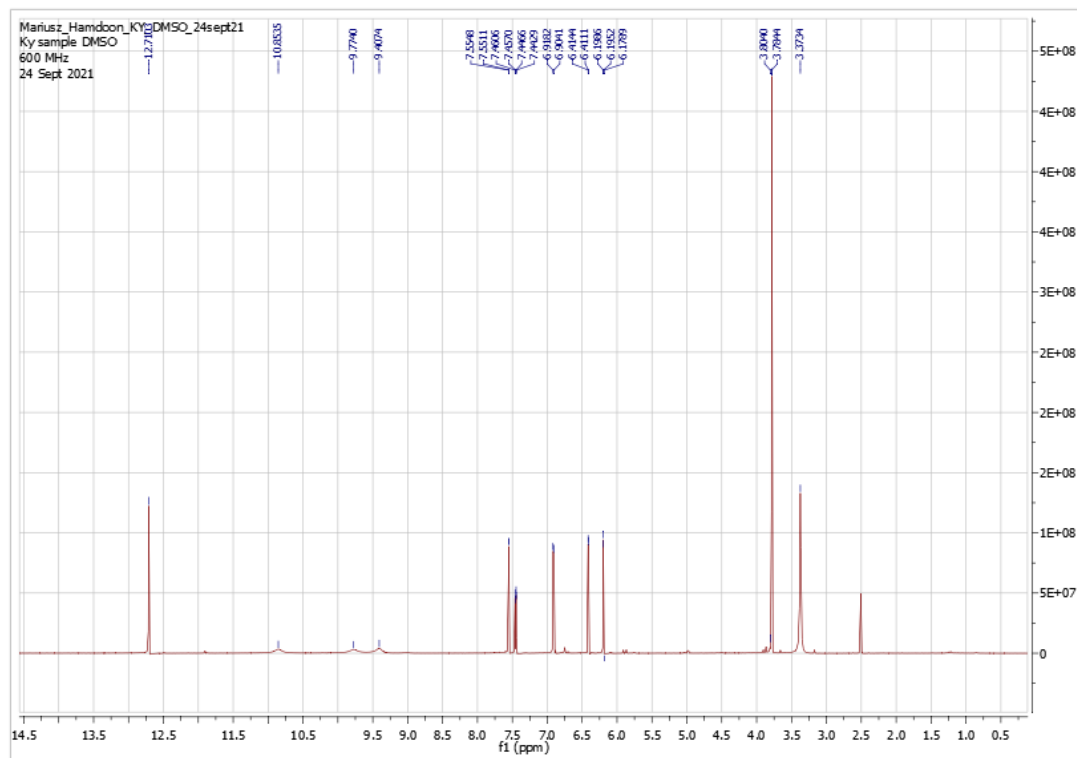

Figure S15:  $^1\text{H}$  NMR spectrum of compound **5** (DMSO- $d_6$ , 600 MHz)

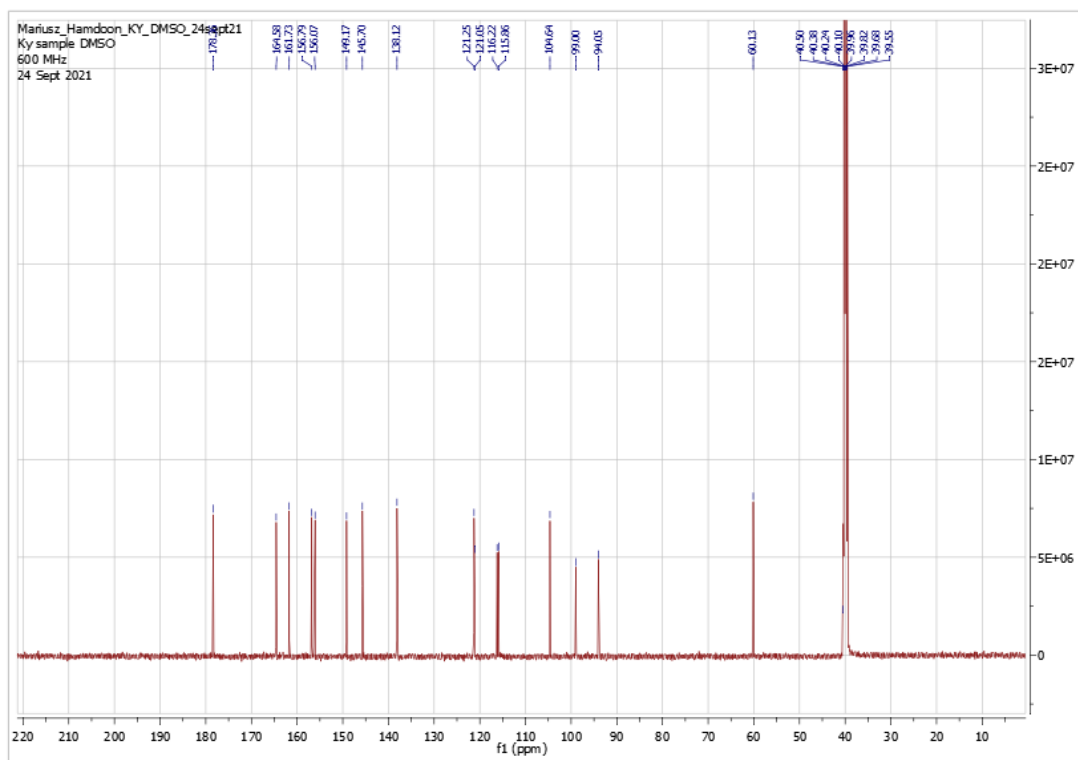

Figure S16:  $^{13}\text{C}$  NMR spectrum of compound **5** (DMSO- $d_6$ , 150 MHz)

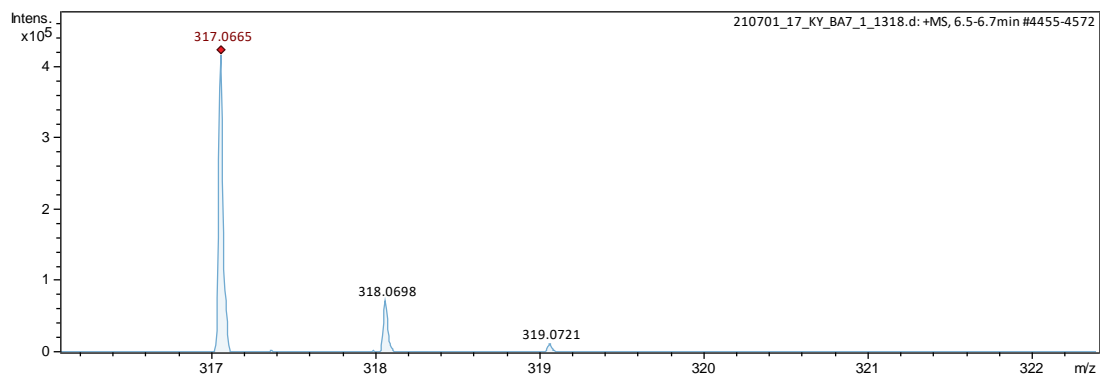

Figure S17: +ESIMS of compound **5**

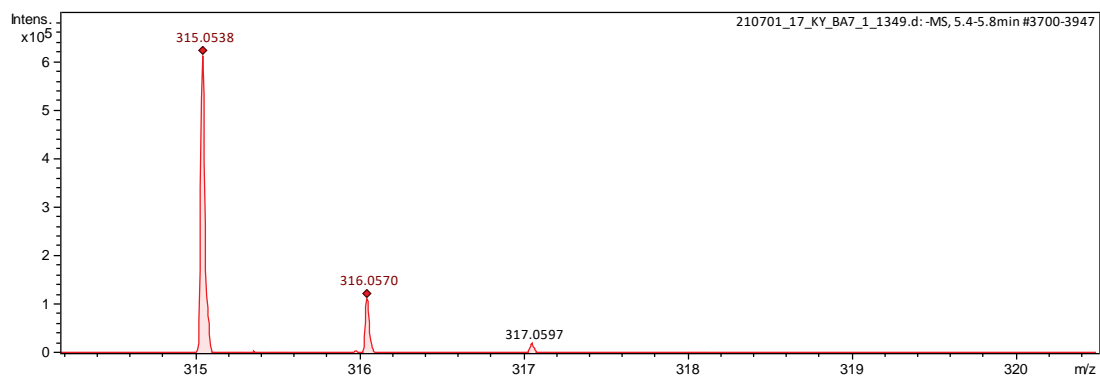

Figure S18: -ESIMS of compound **5**



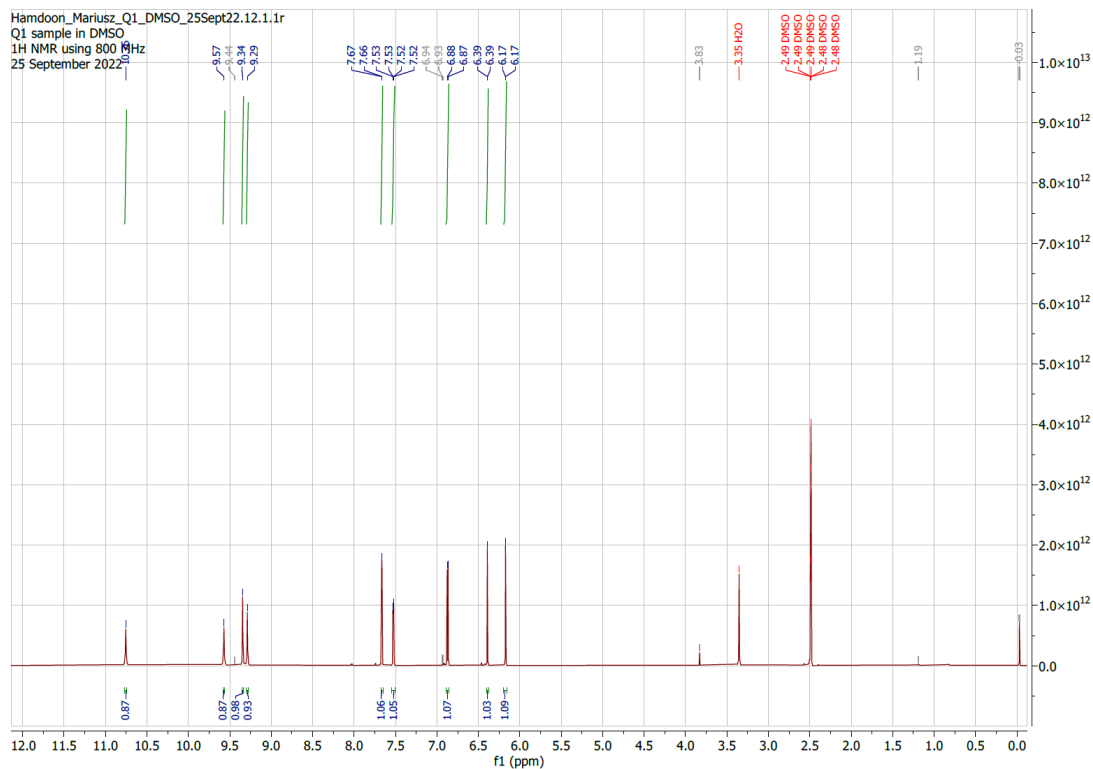

Figure S19:  $^1\text{H}$  NMR spectrum of compound **6** ( $\text{DMSO}-d_6$ , 800 MHz)

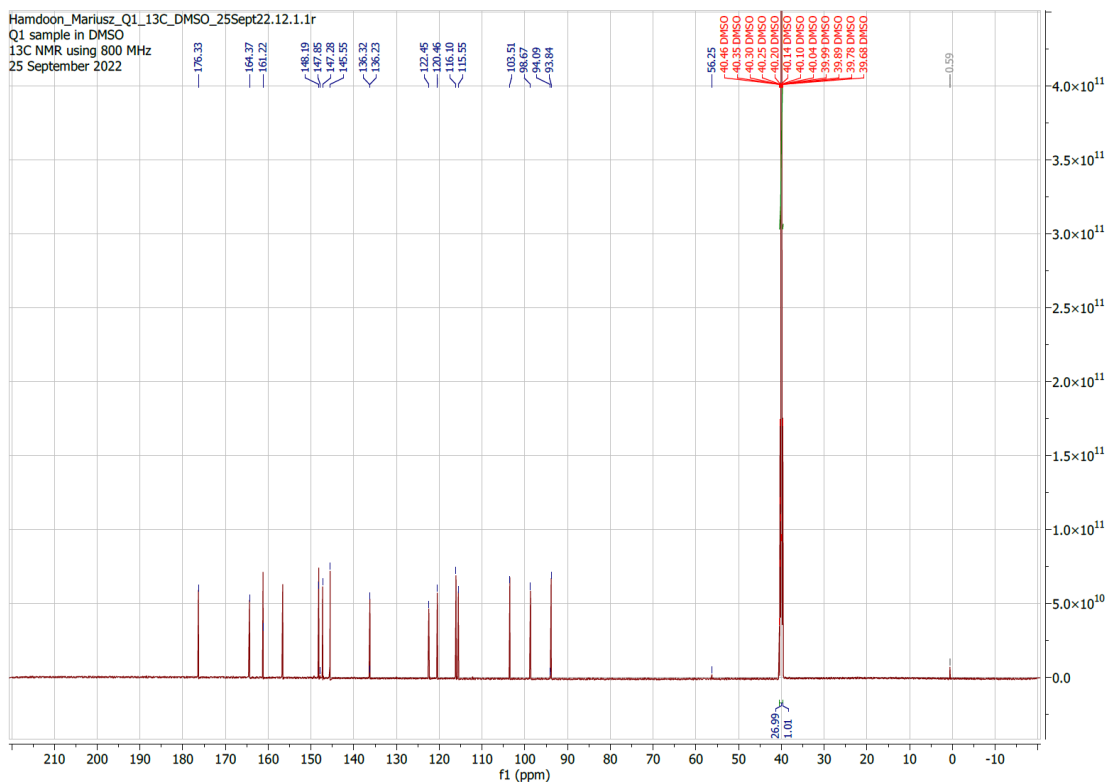

Figure S20:  $^{13}\text{C}$  NMR spectrum of compound **6** ( $\text{DMSO}-d_6$ , 200 MHz)
